# Supplementary material for: Development of Particle Filters for Portable Air Purifiers by Combining Melt‐Blown and Polytetrafluoroethylene to Improve Durability and Performance
Source: Hindawi journal article supplement (doi:10.1155/2024/5055615), 2024-01-01
Supplement: f1 [file 5055615.f1.docx]

Table S1 Parameters of the media tested in this study

| Types | Melt-blown (MB) | Glass fiber (GF) | PTFE membrane (PT) | PT-MB combined media (PM) |
| --- | --- | --- | --- | --- |
| Basic weight (g/m2) | 30±2 | 70±3 | 12± 0.3 | MB: 30±2  PT: 12 ± 0.3 |
| Thickness (mm) | 0.65± 0.05 | 0.8± 0.05 | 0.25± 0.008 | 0.73± 0.05 |
| Fiber diameter (㎛) | 2.5±0.8 | 0.7 ± 0.1 | 0.05 ± 0.02 | MB: 2.5±0.8,  PT: 0.05 ± 0.02 |
| Efficiency(%) for 0.3㎛ particles @ 5cm/s | ≥99.95 | ≥99.95 | ≥99.95 | ≥99.95 |
| Pressure drop (Pa) | 37±4 | 126±11 | 103±9 | 94±7 |
| Layer | MB+TBa | GF | SBb+PTFE+SBb+  PTFE+SBb | MB+SBb+PTFE+SBb |
| Electret | O  (Only MB) | X | X | O  (Only MB) |
| Deposition mechanism | Depth filtration | Depth filtration | Surface filtration | Depth and surface filtration |

a TB: thermal bond

b SB: spun bond

Table S2 Features of the tested air purifiers

| Feature | Coway AP-1018F |
| --- | --- |
| Size (mm) | 376 x 183 x 641 (L x W x H) |
| Weight | 7.25 kg |
| CADR (original filter) | 4.28 m3/min |
| CA Certifieda | Yes |

a CA: Clean Air from the Korea Air Cleaning Association

Table S3 QF value for filter type

| **Loading Time** | **Distribution(㎛)** | **Melt-blown(MB** | | **Glass fiber(GF)** | | **PTFE membrane(PT)** | | **PT-MB combined media (PM)** | |
| --- | --- | --- | --- | --- | --- | --- | --- | --- | --- |
| **Mean** | **S.D.** | **Mean** | **S.D.** | **Mean** | **S.D.** | **Mean** | **S.D.** |
| **0Cycle** | 0.2027 | 0.0260 | 0.0047 | 0.0128 | 0.0009 | 0.0245 | 0.0010 | 0.0288 | 0.0024 |
| 0.2052 | 0.0284 | 0.0042 | 0.0135 | 0.0015 | 0.0253 | 0.0013 | 0.0274 | 0.0030 |
| 0.2079 | 0.0343 | 0.0032 | 0.0117 | 0.0011 | 0.0265 | 0.0012 | 0.0281 | 0.0029 |
| 0.2109 | 0.0337 | 0.0028 | 0.0160 | 0.0004 | 0.0285 | 0.0018 | 0.0270 | 0.0025 |
| 0.2141 | 0.0342 | 0.0054 | 0.0180 | 0.0003 | 0.0270 | 0.0013 | 0.0277 | 0.0027 |
| 0.2177 | 0.0398 | 0.0043 | 0.0175 | 0.0005 | 0.0271 | 0.0009 | 0.0350 | 0.0037 |
| 0.2217 | 0.0432 | 0.0035 | 0.0167 | 0.0007 | 0.0310 | 0.0009 | 0.0342 | 0.0029 |
| 0.2260 | 0.0409 | 0.0028 | 0.0163 | 0.0004 | 0.0295 | 0.0016 | 0.0311 | 0.0025 |
| 0.2308 | 0.0448 | 0.0042 | 0.0175 | 0.0004 | 0.0306 | 0.0015 | 0.0374 | 0.0027 |
| 0.2361 | 0.0492 | 0.0032 | 0.0178 | 0.0005 | 0.0284 | 0.0014 | 0.0377 | 0.0023 |
| 0.2419 | 0.0476 | 0.0028 | 0.0165 | 0.0007 | 0.0313 | 0.0024 | 0.0322 | 0.0036 |
| 0.2483 | 0.0530 | 0.0054 | 0.0183 | 0.0004 | 0.0282 | 0.0022 | 0.0353 | 0.0032 |
| 0.2552 | 0.0550 | 0.0026 | 0.0202 | 0.0004 | 0.0343 | 0.0015 | 0.0346 | 0.0028 |
| 0.2629 | 0.0549 | 0.0015 | 0.0168 | 0.0004 | 0.0347 | 0.0014 | 0.0418 | 0.0009 |
| 0.2712 | 0.0583 | 0.0020 | 0.0187 | 0.0007 | 0.0316 | 0.0011 | 0.0347 | 0.0016 |
| 0.2804 | 0.0589 | 0.0043 | 0.0208 | 0.0005 | 0.0307 | 0.0015 | 0.0383 | 0.0015 |
| 0.2904 | 0.0586 | 0.0029 | 0.0174 | 0.0009 | 0.0357 | 0.0013 | 0.0455 | 0.0014 |
| 0.3013 | 0.0638 | 0.0050 | 0.0175 | 0.0010 | 0.0338 | 0.0009 | 0.0403 | 0.0024 |
| 0.3132 | 0.0653 | 0.0047 | 0.0213 | 0.0009 | 0.0328 | 0.0008 | 0.0378 | 0.0022 |
| 0.3261 | 0.0670 | 0.0022 | 0.0198 | 0.0009 | 0.0365 | 0.0009 | 0.0467 | 0.0015 |
| 0.3403 | 0.0691 | 0.0035 | 0.0203 | 0.0009 | 0.0352 | 0.0007 | 0.0453 | 0.0014 |
| 0.3557 | 0.0747 | 0.0062 | 0.0192 | 0.0007 | 0.0361 | 0.0008 | 0.0496 | 0.0011 |
| 0.3724 | 0.0735 | 0.0037 | 0.0182 | 0.0008 | 0.0351 | 0.0007 | 0.0473 | 0.0015 |
| 0.3907 | 0.0814 | 0.0065 | 0.0200 | 0.0005 | 0.0349 | 0.0007 | 0.0465 | 0.0024 |
| 0.4105 | 0.0791 | 0.0043 | 0.0183 | 0.0005 | 0.0340 | 0.0004 | 0.0498 | 0.0022 |
| 0.4321 | 0.0708 | 0.0016 | 0.0177 | 0.0005 | 0.0391 | 0.0005 | 0.0474 | 0.0015 |
| 0.4555 | 0.0811 | 0.0012 | 0.0194 | 0.0003 | 0.0415 | 0.0006 | 0.0520 | 0.0014 |
| 0.4810 | 0.1027 | 0.0032 | 0.0208 | 0.0006 | 0.0368 | 0.0006 | 0.0555 | 0.0009 |
| 0.5088 | 0.1044 | 0.0025 | 0.0195 | 0.0005 | 0.0442 | 0.0005 | 0.0561 | 0.0009 |
| 0.5389 | 0.0974 | 0.0019 | 0.0197 | 0.0005 | 0.0454 | 0.0004 | 0.0596 | 0.0016 |
| 0.5716 | 0.1060 | 0.0028 | 0.0198 | 0.0005 | 0.0515 | 0.0004 | 0.0572 | 0.0015 |
| 0.6071 | 0.1155 | 0.0016 | 0.0207 | 0.0003 | 0.0515 | 0.0005 | 0.0596 | 0.0014 |
| 0.6457 | 0.1198 | 0.0030 | 0.0227 | 0.0004 | 0.0515 | 0.0005 | 0.0656 | 0.0009 |
| 0.6875 | 0.1245 | 0.0015 | 0.0192 | 0.0004 | 0.0507 | 0.0006 | 0.0656 | 0.0008 |
| 0.7329 | 0.1355 | 0.0022 | 0.0217 | 0.0005 | 0.0507 | 0.0005 | 0.0640 | 0.0009 |
| 0.7822 | 0.1171 | 0.0019 | 0.0237 | 0.0004 | 0.0515 | 0.0004 | 0.0656 | 0.0007 |
| 0.8356 | 0.1282 | 0.0014 | 0.0217 | 0.0004 | 0.0497 | 0.0004 | 0.0656 | 0.0008 |
| 0.8935 | 0.1355 | 0.0010 | 0.0266 | 0.0005 | 0.0487 | 0.0003 | 0.0656 | 0.0007 |
| 0.9562 | 0.1268 | 0.0008 | 0.0277 | 0.0007 | 0.0515 | 0.0004 | 0.0647 | 0.0007 |
| 1.0240 | 0.1355 | 0.0010 | 0.0277 | 0.0006 | 0.0515 | 0.0004 | 0.0656 | 0.0004 |
| 1.0975 | 0.1355 | 0.0009 | 0.0252 | 0.0006 | 0.0492 | 0.0003 | 0.0656 | 0.0005 |
| 1.1769 | 0.1355 | 0.0009 | 0.0277 | 0.0005 | 0.0515 | 0.0004 | 0.0656 | 0.0006 |
| **2Cycle** | 0.2027 | 0.0202 | 0.0028 | 0.0103 | 0.0011 | 0.0150 | 0.0022 | 0.0194 | 0.0022 |
| 0.2052 | 0.0234 | 0.0054 | 0.0119 | 0.0016 | 0.0188 | 0.0015 | 0.0210 | 0.0026 |
| 0.2079 | 0.0239 | 0.0043 | 0.0125 | 0.0013 | 0.0189 | 0.0014 | 0.0238 | 0.0022 |
| 0.2109 | 0.0250 | 0.0035 | 0.0121 | 0.0003 | 0.0210 | 0.0011 | 0.0220 | 0.0024 |
| 0.2141 | 0.0270 | 0.0028 | 0.0122 | 0.0004 | 0.0181 | 0.0015 | 0.0238 | 0.0022 |
| 0.2177 | 0.0267 | 0.0054 | 0.0132 | 0.0004 | 0.0200 | 0.0013 | 0.0235 | 0.0020 |
| 0.2217 | 0.0305 | 0.0037 | 0.0120 | 0.0004 | 0.0208 | 0.0009 | 0.0314 | 0.0028 |
| 0.2260 | 0.0308 | 0.0044 | 0.0133 | 0.0004 | 0.0213 | 0.0008 | 0.0274 | 0.0026 |
| 0.2308 | 0.0322 | 0.0047 | 0.0134 | 0.0004 | 0.0216 | 0.0009 | 0.0279 | 0.0024 |
| 0.2361 | 0.0356 | 0.0043 | 0.0158 | 0.0005 | 0.0219 | 0.0012 | 0.0253 | 0.0025 |
| 0.2419 | 0.0354 | 0.0029 | 0.0137 | 0.0007 | 0.0210 | 0.0018 | 0.0337 | 0.0032 |
| 0.2483 | 0.0371 | 0.0050 | 0.0140 | 0.0008 | 0.0206 | 0.0013 | 0.0285 | 0.0028 |
| 0.2552 | 0.0375 | 0.0047 | 0.0142 | 0.0007 | 0.0206 | 0.0009 | 0.0316 | 0.0018 |
| 0.2629 | 0.0405 | 0.0022 | 0.0164 | 0.0005 | 0.0208 | 0.0009 | 0.0317 | 0.0014 |
| 0.2712 | 0.0400 | 0.0022 | 0.0166 | 0.0005 | 0.0200 | 0.0016 | 0.0387 | 0.0018 |
| 0.2804 | 0.0425 | 0.0065 | 0.0159 | 0.0003 | 0.0232 | 0.0014 | 0.0298 | 0.0016 |
| 0.2904 | 0.0425 | 0.0043 | 0.0144 | 0.0005 | 0.0234 | 0.0011 | 0.0341 | 0.0015 |
| 0.3013 | 0.0408 | 0.0050 | 0.0150 | 0.0009 | 0.0260 | 0.0015 | 0.0303 | 0.0014 |
| 0.3132 | 0.0451 | 0.0042 | 0.0163 | 0.0007 | 0.0240 | 0.0013 | 0.0347 | 0.0011 |
| 0.3261 | 0.0448 | 0.0032 | 0.0154 | 0.0003 | 0.0241 | 0.0009 | 0.0406 | 0.0015 |
| 0.3403 | 0.0473 | 0.0032 | 0.0164 | 0.0006 | 0.0247 | 0.0007 | 0.0322 | 0.0016 |
| 0.3557 | 0.0517 | 0.0025 | 0.0165 | 0.0003 | 0.0224 | 0.0008 | 0.0363 | 0.0015 |
| 0.3724 | 0.0534 | 0.0019 | 0.0171 | 0.0006 | 0.0250 | 0.0007 | 0.0411 | 0.0014 |
| 0.3907 | 0.0477 | 0.0028 | 0.0150 | 0.0005 | 0.0223 | 0.0007 | 0.0462 | 0.0009 |
| 0.4105 | 0.0410 | 0.0016 | 0.0156 | 0.0005 | 0.0230 | 0.0004 | 0.0435 | 0.0016 |
| 0.4321 | 0.0593 | 0.0030 | 0.0156 | 0.0005 | 0.0253 | 0.0005 | 0.0468 | 0.0022 |
| 0.4555 | 0.0635 | 0.0016 | 0.0165 | 0.0003 | 0.0282 | 0.0006 | 0.0471 | 0.0015 |
| 0.4810 | 0.0572 | 0.0012 | 0.0175 | 0.0005 | 0.0274 | 0.0006 | 0.0475 | 0.0014 |
| 0.5088 | 0.0609 | 0.0032 | 0.0169 | 0.0005 | 0.0294 | 0.0004 | 0.0518 | 0.0009 |
| 0.5389 | 0.0643 | 0.0016 | 0.0175 | 0.0005 | 0.0297 | 0.0005 | 0.0518 | 0.0009 |
| 0.5716 | 0.0728 | 0.0030 | 0.0163 | 0.0004 | 0.0310 | 0.0005 | 0.0518 | 0.0009 |
| 0.6071 | 0.0785 | 0.0012 | 0.0174 | 0.0005 | 0.0310 | 0.0006 | 0.0518 | 0.0007 |
| 0.6457 | 0.0698 | 0.0022 | 0.0181 | 0.0007 | 0.0310 | 0.0004 | 0.0518 | 0.0008 |
| 0.6875 | 0.0735 | 0.0016 | 0.0186 | 0.0007 | 0.0310 | 0.0005 | 0.0518 | 0.0007 |
| 0.7329 | 0.0773 | 0.0028 | 0.0180 | 0.0004 | 0.0310 | 0.0005 | 0.0518 | 0.0007 |
| 0.7822 | 0.0690 | 0.0015 | 0.0190 | 0.0006 | 0.0298 | 0.0006 | 0.0474 | 0.0008 |
| 0.8356 | 0.0718 | 0.0022 | 0.0182 | 0.0007 | 0.0310 | 0.0005 | 0.0497 | 0.0007 |
| 0.8935 | 0.0735 | 0.0019 | 0.0195 | 0.0005 | 0.0310 | 0.0004 | 0.0518 | 0.0007 |
| 0.9562 | 0.0696 | 0.0014 | 0.0200 | 0.0005 | 0.0310 | 0.0004 | 0.0494 | 0.0004 |
| 1.0240 | 0.0707 | 0.0016 | 0.0195 | 0.0004 | 0.0289 | 0.0004 | 0.0518 | 0.0005 |
| 1.0975 | 0.0715 | 0.0016 | 0.0192 | 0.0005 | 0.0310 | 0.0003 | 0.0518 | 0.0006 |
| 1.1769 | 0.0744 | 0.0009 | 0.0192 | 0.0007 | 0.0310 | 0.0004 | 0.0518 | 0.0006 |
| **4Cycle** | 0.2027 | 0.0039 | 0.0050 | 0.0098 | 0.0009 | 0.0093 | 0.0022 | 0.0163 | 0.0022 |
| 0.2052 | 0.0058 | 0.0042 | 0.0087 | 0.0009 | 0.0086 | 0.0015 | 0.0157 | 0.0024 |
| 0.2079 | 0.0058 | 0.0032 | 0.0112 | 0.0015 | 0.0107 | 0.0014 | 0.0176 | 0.0022 |
| 0.2109 | 0.0061 | 0.0032 | 0.0112 | 0.0004 | 0.0141 | 0.0013 | 0.0184 | 0.0020 |
| 0.2141 | 0.0080 | 0.0025 | 0.0124 | 0.0004 | 0.0134 | 0.0012 | 0.0184 | 0.0028 |
| 0.2177 | 0.0075 | 0.0019 | 0.0129 | 0.0004 | 0.0148 | 0.0018 | 0.0232 | 0.0024 |
| 0.2217 | 0.0087 | 0.0043 | 0.0126 | 0.0004 | 0.0133 | 0.0013 | 0.0211 | 0.0030 |
| 0.2260 | 0.0096 | 0.0029 | 0.0138 | 0.0004 | 0.0145 | 0.0009 | 0.0181 | 0.0029 |
| 0.2308 | 0.0100 | 0.0050 | 0.0131 | 0.0005 | 0.0147 | 0.0007 | 0.0212 | 0.0025 |
| 0.2361 | 0.0103 | 0.0047 | 0.0125 | 0.0007 | 0.0174 | 0.0008 | 0.0205 | 0.0027 |
| 0.2419 | 0.0112 | 0.0022 | 0.0129 | 0.0004 | 0.0174 | 0.0009 | 0.0219 | 0.0036 |
| 0.2483 | 0.0124 | 0.0049 | 0.0134 | 0.0004 | 0.0178 | 0.0009 | 0.0233 | 0.0032 |
| 0.2552 | 0.0125 | 0.0037 | 0.0143 | 0.0004 | 0.0164 | 0.0012 | 0.0245 | 0.0028 |
| 0.2629 | 0.0132 | 0.0044 | 0.0130 | 0.0007 | 0.0148 | 0.0018 | 0.0216 | 0.0009 |
| 0.2712 | 0.0136 | 0.0047 | 0.0138 | 0.0010 | 0.0158 | 0.0009 | 0.0266 | 0.0016 |
| 0.2804 | 0.0142 | 0.0043 | 0.0135 | 0.0011 | 0.0176 | 0.0009 | 0.0243 | 0.0028 |
| 0.2904 | 0.0145 | 0.0050 | 0.0142 | 0.0010 | 0.0154 | 0.0009 | 0.0269 | 0.0018 |
| 0.3013 | 0.0156 | 0.0042 | 0.0141 | 0.0014 | 0.0187 | 0.0014 | 0.0227 | 0.0014 |
| 0.3132 | 0.0155 | 0.0032 | 0.0153 | 0.0021 | 0.0174 | 0.0011 | 0.0228 | 0.0018 |
| 0.3261 | 0.0166 | 0.0042 | 0.0156 | 0.0021 | 0.0176 | 0.0015 | 0.0265 | 0.0016 |
| 0.3403 | 0.0180 | 0.0032 | 0.0154 | 0.0015 | 0.0164 | 0.0007 | 0.0288 | 0.0015 |
| 0.3557 | 0.0205 | 0.0032 | 0.0159 | 0.0009 | 0.0178 | 0.0004 | 0.0258 | 0.0014 |
| 0.3724 | 0.0216 | 0.0025 | 0.0165 | 0.0008 | 0.0185 | 0.0005 | 0.0277 | 0.0011 |
| 0.3907 | 0.0170 | 0.0016 | 0.0152 | 0.0007 | 0.0177 | 0.0007 | 0.0272 | 0.0015 |
| 0.4105 | 0.0116 | 0.0030 | 0.0154 | 0.0013 | 0.0171 | 0.0007 | 0.0269 | 0.0016 |
| 0.4321 | 0.0260 | 0.0016 | 0.0150 | 0.0017 | 0.0198 | 0.0004 | 0.0299 | 0.0014 |
| 0.4555 | 0.0274 | 0.0012 | 0.0149 | 0.0015 | 0.0218 | 0.0005 | 0.0281 | 0.0009 |
| 0.4810 | 0.0261 | 0.0032 | 0.0160 | 0.0009 | 0.0220 | 0.0005 | 0.0299 | 0.0009 |
| 0.5088 | 0.0246 | 0.0016 | 0.0159 | 0.0009 | 0.0248 | 0.0005 | 0.0342 | 0.0009 |
| 0.5389 | 0.0277 | 0.0030 | 0.0157 | 0.0008 | 0.0248 | 0.0006 | 0.0348 | 0.0007 |
| 0.5716 | 0.0276 | 0.0016 | 0.0150 | 0.0009 | 0.0220 | 0.0004 | 0.0399 | 0.0008 |
| 0.6071 | 0.0299 | 0.0030 | 0.0170 | 0.0008 | 0.0216 | 0.0005 | 0.0399 | 0.0007 |
| 0.6457 | 0.0266 | 0.0016 | 0.0172 | 0.0003 | 0.0248 | 0.0008 | 0.0399 | 0.0007 |
| 0.6875 | 0.0279 | 0.0012 | 0.0162 | 0.0005 | 0.0248 | 0.0006 | 0.0399 | 0.0008 |
| 0.7329 | 0.0291 | 0.0016 | 0.0152 | 0.0005 | 0.0248 | 0.0008 | 0.0362 | 0.0009 |
| 0.7822 | 0.0280 | 0.0012 | 0.0160 | 0.0004 | 0.0216 | 0.0007 | 0.0399 | 0.0007 |
| 0.8356 | 0.0303 | 0.0032 | 0.0155 | 0.0005 | 0.0215 | 0.0004 | 0.0399 | 0.0008 |
| 0.8935 | 0.0338 | 0.0010 | 0.0147 | 0.0007 | 0.0230 | 0.0004 | 0.0399 | 0.0007 |
| 0.9562 | 0.0344 | 0.0009 | 0.0145 | 0.0007 | 0.0248 | 0.0005 | 0.0399 | 0.0004 |
| 1.0240 | 0.0336 | 0.0008 | 0.0150 | 0.0004 | 0.0248 | 0.0004 | 0.0399 | 0.0004 |
| 1.0975 | 0.0355 | 0.0010 | 0.0149 | 0.0004 | 0.0234 | 0.0004 | 0.0399 | 0.0003 |
| 1.1769 | 0.0416 | 0.0009 | 0.0146 | 0.0007 | 0.0218 | 0.0004 | 0.0399 | 0.0004 |
| **6Cycle** | 0.2027 | 0.0019 | 0.0030 | 0.0084 | 0.0005 | 0.0090 | 0.0014 | 0.0127 | 0.0014 |
| 0.2052 | 0.0019 | 0.0016 | 0.0079 | 0.0007 | 0.0094 | 0.0013 | 0.0143 | 0.0024 |
| 0.2079 | 0.0028 | 0.0030 | 0.0096 | 0.0006 | 0.0095 | 0.0012 | 0.0156 | 0.0030 |
| 0.2109 | 0.0034 | 0.0043 | 0.0092 | 0.0007 | 0.0102 | 0.0018 | 0.0177 | 0.0029 |
| 0.2141 | 0.0035 | 0.0029 | 0.0118 | 0.0004 | 0.0096 | 0.0015 | 0.0153 | 0.0025 |
| 0.2177 | 0.0034 | 0.0050 | 0.0107 | 0.0004 | 0.0123 | 0.0014 | 0.0139 | 0.0027 |
| 0.2217 | 0.0049 | 0.0050 | 0.0115 | 0.0005 | 0.0111 | 0.0024 | 0.0156 | 0.0037 |
| 0.2260 | 0.0050 | 0.0047 | 0.0115 | 0.0007 | 0.0111 | 0.0022 | 0.0173 | 0.0029 |
| 0.2308 | 0.0051 | 0.0022 | 0.0124 | 0.0004 | 0.0120 | 0.0014 | 0.0204 | 0.0025 |
| 0.2361 | 0.0059 | 0.0035 | 0.0130 | 0.0004 | 0.0145 | 0.0024 | 0.0190 | 0.0020 |
| 0.2419 | 0.0075 | 0.0062 | 0.0122 | 0.0005 | 0.0139 | 0.0022 | 0.0220 | 0.0028 |
| 0.2483 | 0.0074 | 0.0065 | 0.0131 | 0.0007 | 0.0122 | 0.0015 | 0.0186 | 0.0024 |
| 0.2552 | 0.0078 | 0.0043 | 0.0137 | 0.0004 | 0.0149 | 0.0022 | 0.0215 | 0.0030 |
| 0.2629 | 0.0074 | 0.0044 | 0.0131 | 0.0004 | 0.0139 | 0.0015 | 0.0208 | 0.0029 |
| 0.2712 | 0.0083 | 0.0047 | 0.0135 | 0.0005 | 0.0140 | 0.0014 | 0.0217 | 0.0025 |
| 0.2804 | 0.0091 | 0.0043 | 0.0133 | 0.0015 | 0.0142 | 0.0015 | 0.0222 | 0.0027 |
| 0.2904 | 0.0090 | 0.0029 | 0.0130 | 0.0009 | 0.0142 | 0.0013 | 0.0214 | 0.0031 |
| 0.3013 | 0.0090 | 0.0025 | 0.0132 | 0.0008 | 0.0144 | 0.0012 | 0.0217 | 0.0014 |
| 0.3132 | 0.0092 | 0.0016 | 0.0147 | 0.0007 | 0.0137 | 0.0018 | 0.0217 | 0.0018 |
| 0.3261 | 0.0101 | 0.0030 | 0.0137 | 0.0013 | 0.0161 | 0.0013 | 0.0232 | 0.0016 |
| 0.3403 | 0.0109 | 0.0016 | 0.0151 | 0.0017 | 0.0152 | 0.0009 | 0.0238 | 0.0015 |
| 0.3557 | 0.0129 | 0.0030 | 0.0157 | 0.0014 | 0.0159 | 0.0009 | 0.0239 | 0.0014 |
| 0.3724 | 0.0136 | 0.0016 | 0.0158 | 0.0015 | 0.0145 | 0.0009 | 0.0257 | 0.0011 |
| 0.3907 | 0.0117 | 0.0012 | 0.0143 | 0.0009 | 0.0144 | 0.0005 | 0.0217 | 0.0015 |
| 0.4105 | 0.0067 | 0.0016 | 0.0148 | 0.0008 | 0.0164 | 0.0007 | 0.0214 | 0.0009 |
| 0.4321 | 0.0142 | 0.0030 | 0.0145 | 0.0009 | 0.0166 | 0.0004 | 0.0240 | 0.0009 |
| 0.4555 | 0.0180 | 0.0016 | 0.0143 | 0.0008 | 0.0193 | 0.0005 | 0.0244 | 0.0007 |
| 0.4810 | 0.0166 | 0.0012 | 0.0143 | 0.0009 | 0.0188 | 0.0006 | 0.0282 | 0.0008 |
| 0.5088 | 0.0166 | 0.0016 | 0.0150 | 0.0009 | 0.0160 | 0.0010 | 0.0312 | 0.0007 |
| 0.5389 | 0.0175 | 0.0016 | 0.0151 | 0.0009 | 0.0182 | 0.0006 | 0.0342 | 0.0007 |
| 0.5716 | 0.0215 | 0.0012 | 0.0140 | 0.0008 | 0.0193 | 0.0005 | 0.0342 | 0.0005 |
| 0.6071 | 0.0208 | 0.0016 | 0.0150 | 0.0008 | 0.0193 | 0.0004 | 0.0342 | 0.0007 |
| 0.6457 | 0.0225 | 0.0016 | 0.0156 | 0.0003 | 0.0209 | 0.0004 | 0.0342 | 0.0004 |
| 0.6875 | 0.0214 | 0.0016 | 0.0158 | 0.0005 | 0.0193 | 0.0003 | 0.0342 | 0.0005 |
| 0.7329 | 0.0210 | 0.0016 | 0.0146 | 0.0005 | 0.0209 | 0.0004 | 0.0342 | 0.0006 |
| 0.7822 | 0.0191 | 0.0012 | 0.0149 | 0.0004 | 0.0187 | 0.0004 | 0.0295 | 0.0010 |
| 0.8356 | 0.0227 | 0.0016 | 0.0149 | 0.0005 | 0.0191 | 0.0004 | 0.0342 | 0.0006 |
| 0.8935 | 0.0257 | 0.0030 | 0.0146 | 0.0005 | 0.0209 | 0.0005 | 0.0342 | 0.0005 |
| 0.9562 | 0.0271 | 0.0010 | 0.0137 | 0.0005 | 0.0200 | 0.0004 | 0.0342 | 0.0004 |
| 1.0240 | 0.0257 | 0.0009 | 0.0132 | 0.0007 | 0.0208 | 0.0004 | 0.0323 | 0.0004 |
| 1.0975 | 0.0264 | 0.0008 | 0.0125 | 0.0005 | 0.0174 | 0.0004 | 0.0342 | 0.0003 |
| 1.1769 | 0.0334 | 0.0010 | 0.0126 | 0.0007 | 0.0162 | 0.0004 | 0.0342 | 0.0004 |


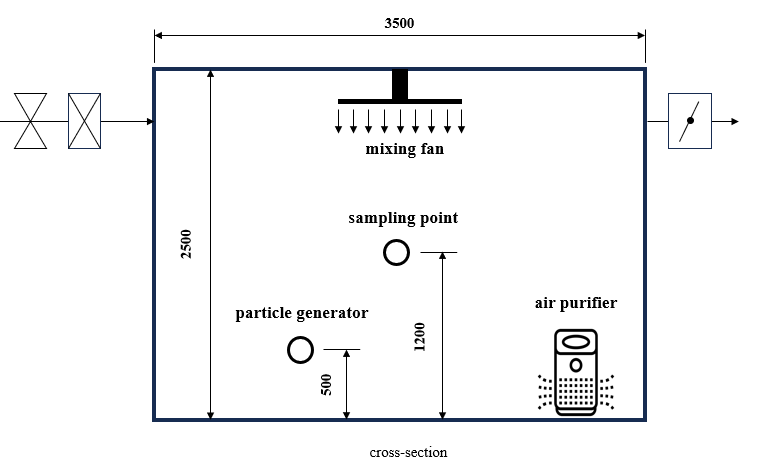


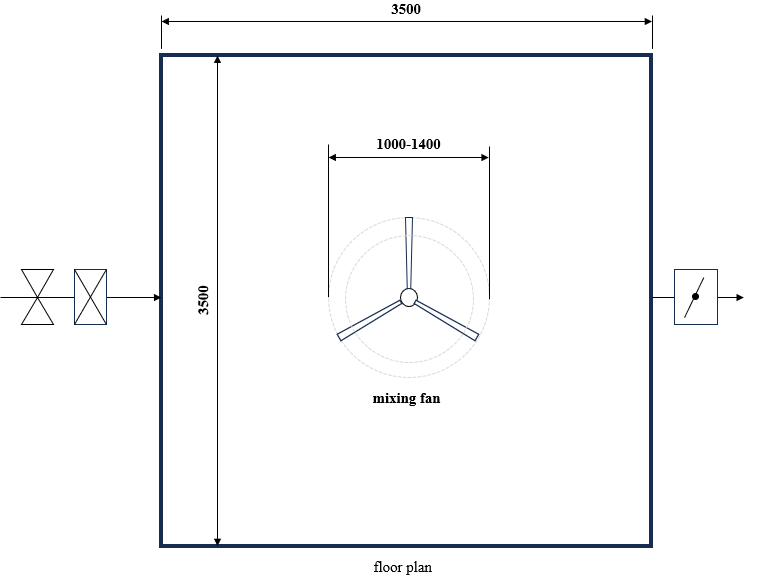


Fig. S1 Schematic of the test chamber specified in the KACA to evaluate the performance of a portable air purifier.

Fig S2. Comparison of filtration penetration and pressure drop of MB, GF, PM and PT filters at particle size 0.3μm and face velocity 1m/s.
